# Supplementary material for: A unique class of Zn2+-binding serine-based PBPs underlies cephalosporin resistance and sporogenesis in Clostridioides difficile
Source: PubMed Central journal article supplement (PMC9334274; doi:10.1038/s41467-022-32086-6), 2022-07-28
Supplement: 41467_2022_32086_MOESM3_ESM.pdf [file 41467_2022_32086_MOESM3_ESM.pdf]

**Title:** Supplementary Data 1

**Description:** Bacteria with PBPs containing Zn<sup>2+</sup>-binding motifs.

**Title:** Supplementary Data 2

**Description:** PBP proteins for phylogenetic analysis. PBP proteins containing a Zn<sup>2+</sup>-binding motif are shaded red, those without are shaded blue.
